# Supplementary material
Source: Springer Nature journal article supplement (https://www.springermedizin.de/resource/supplementary/12883_2013_859_MOESM2_ESM.pdf/9456014)
Supplement: MOESM2 [file 9456014]

Widescreen LCD-monitor

Movable frame

Keyboard and mouse control

Receiving units for inertial sensor(s)

PC with USB port for data input

Force plate

A

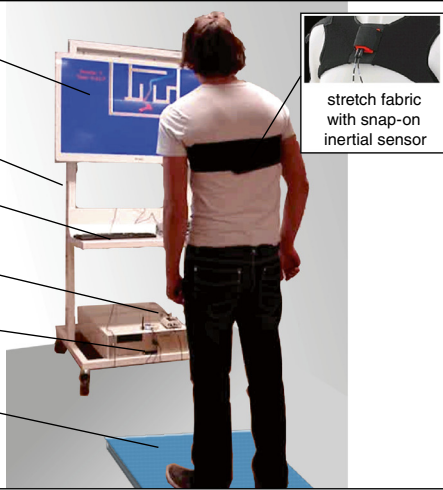

stretch fabric  
with snap-on  
inertial sensor

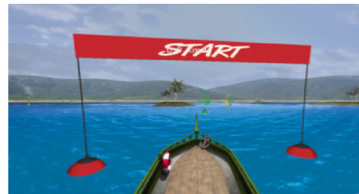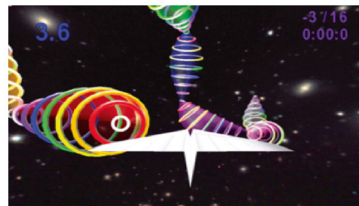

B
